# Supplementary material
Source: PubMed Central journal article supplement (PMC3928821)
Supplement: Supp_Fig1.pdf [file Supp_Fig1.pdf]

## Supplementary Data

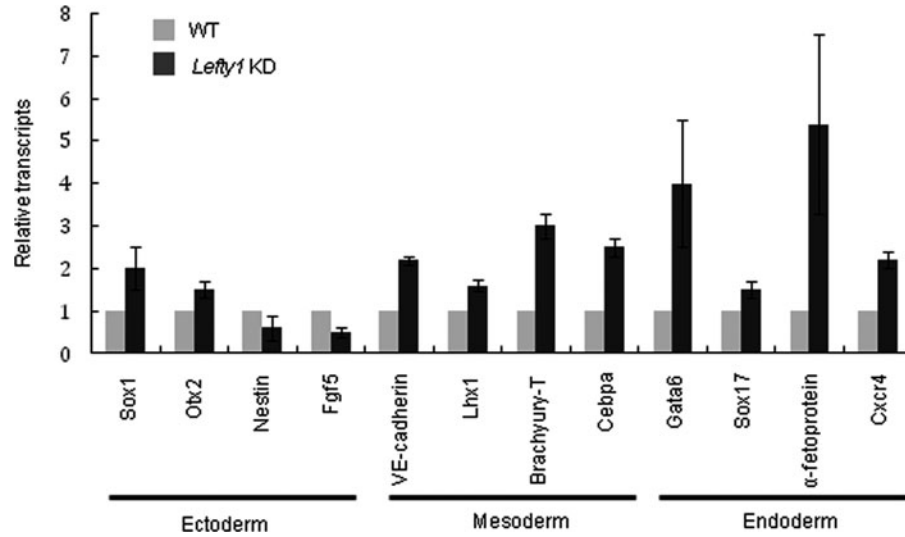

**SUPPLEMENTARY FIG. S1.** *Lefty1* KD cells were spontaneously differentiated for 3 days and expression of the indicated genes was analyzed by real-time reverse transcriptase (RT)-PCR.
