# Supplementary material
Source: PubMed Central journal article supplement (PMC3928821)
Supplement: Supp_Fig2.pdf [file Supp_Fig2.pdf]

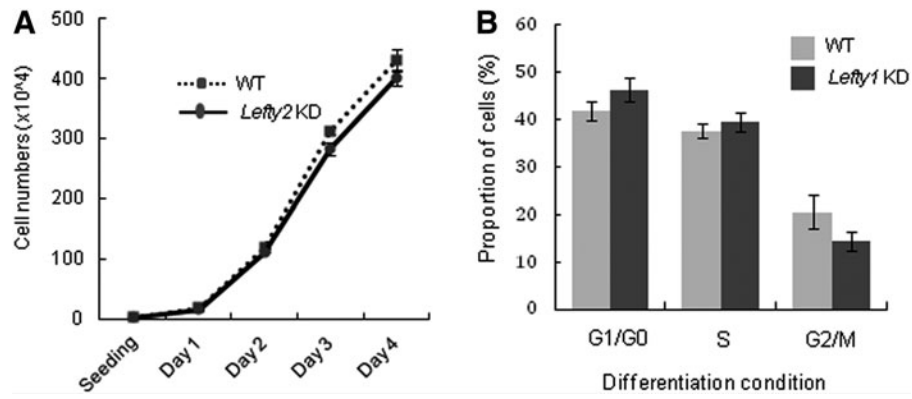

**SUPPLEMENTARY FIG. S2.** Cell proliferation (A) and the cell cycle profile (B) of differentiating *Lefty1* KD cells were compared with those of the WT cells. Cells were differentiated by removing leukemia inhibitory factor (LIF) and adding RA for 3 days (RA-d3). WT, wild type mESCs; RA, retinoic acid.
