# Supplementary material
Source: PubMed Central journal article supplement (PMC3928821)
Supplement: Supp_Fig3.pdf [file Supp_Fig3.pdf]

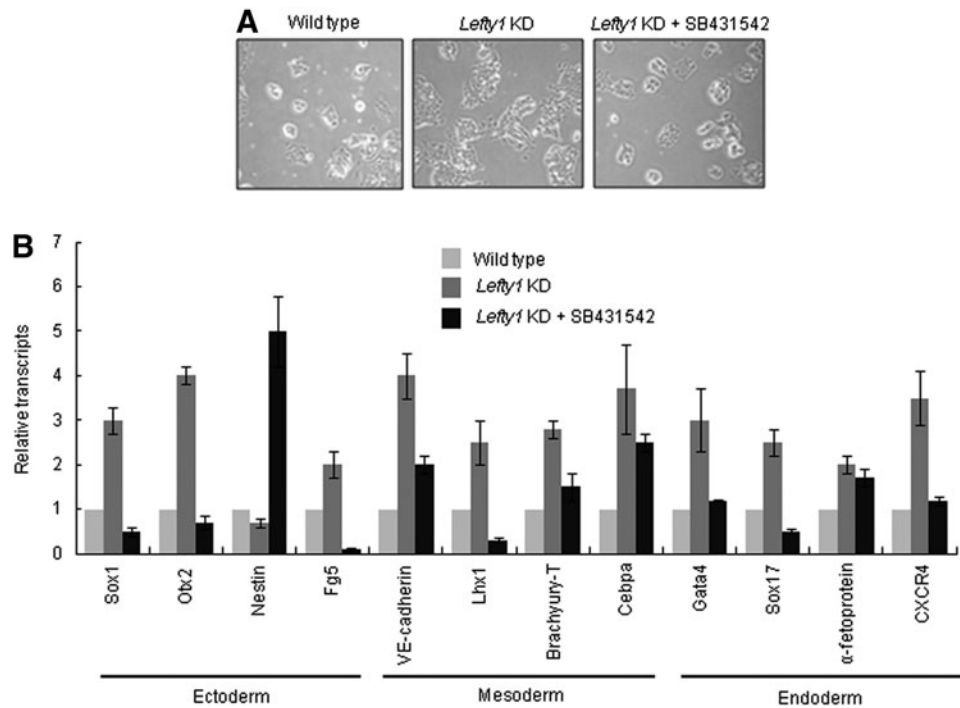

**SUPPLEMENTARY FIG. S3.** *Lefty1* KD cells were differentiated for 3 days by removing LIF and adding RA in the presence or absence of SB431542 (20  $\mu$ M). Cell morphology (**A**) and the expression of lineage markers (**B**) was analyzed by real-time RT-PCR. All values are expressed as the mean  $\pm$  SD of at least three independent experiments.
