# Supplementary material
Source: PubMed Central journal article supplement (PMC3928821)
Supplement: Supp_Fig4.pdf [file Supp_Fig4.pdf]

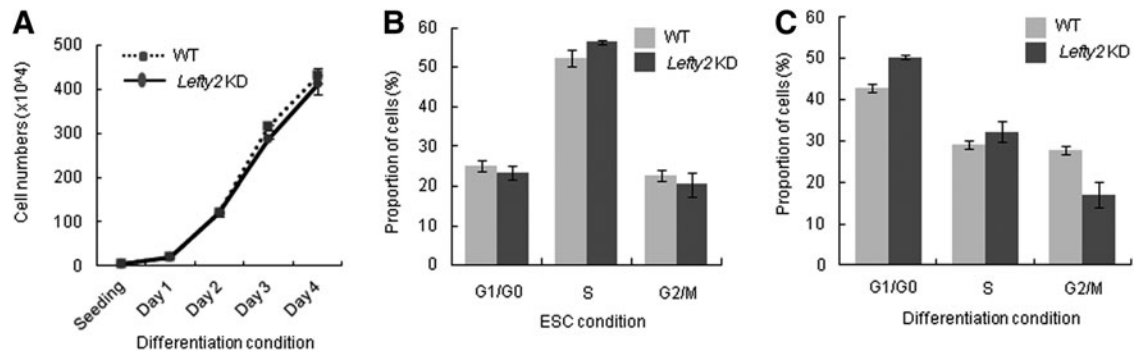

**SUPPLEMENTARY FIG. S4.** (A) Proliferation of differentiating *Lefty2* KD cells was compared with that of the WT at the indicated times. Cell cycle profiles of *Lefty2* KD cells were compared with those of the WT under ESC culture conditions (B) or differentiation conditions (C). Cells were differentiated by removing LIF and adding RA for 3 days (RA-d3).
