# Supplementary material
Source: PubMed Central journal article supplement (PMC3928821)
Supplement: Supp_Fig6.pdf [file Supp_Fig6.pdf]

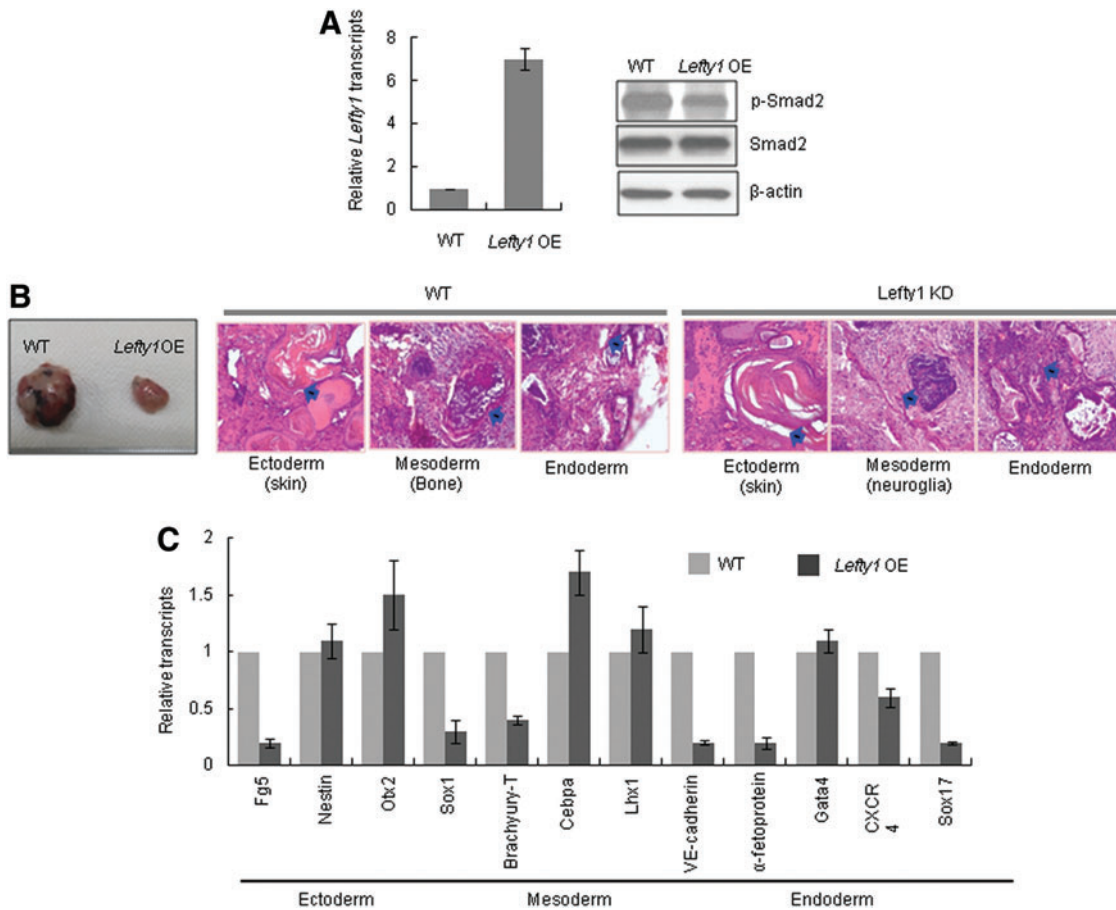

**SUPPLEMENTARY FIG. S6.** (A) The level of *Lefty1* expression in the *Lefty1* OE cell line was analyzed by real-time RT-PCR (left panel). The phospho-Smad2 level in *Lefty1* OE cells under self-renewal culture conditions was analyzed by immunoblotting (right panel). (B) *Lefty1* OE and WT cells were injected into NOD/SCID mice and teratomas were allowed to develop for 8 weeks. Teratomas were stained with hematoxylin-eosin and the epithelium, muscle, cartilage, and epidermis in the teratomas were identified by examination under a light microscope. (C) Lineage-specific marker expression in *Lefty1* OE teratomas was compared with that in WT teratomas by real-time RT-PCR. All values are expressed as the mean  $\pm$  SD from at least three independent experiments. *Lefty1* OE, stable *Lefty1*-overexpressing mESC line; WT, wild-type mESCs.
