# Supplementary material
Source: PubMed Central journal article supplement (PMC3928821)
Supplement: Supp_Fig7.pdf [file Supp_Fig7.pdf]

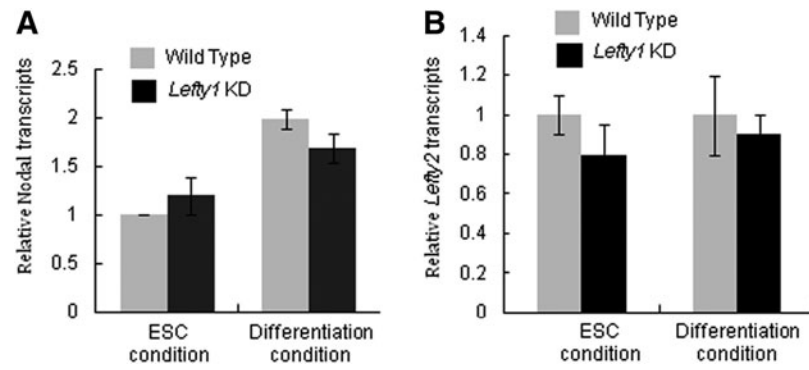

**SUPPLEMENTARY FIG. S7.** Nodal expression (A) and *Lefty2* expression (B) in *Lefty1* KD and WT cells were analyzed by real-time RT-PCR.
