# Supplementary material
Source: PubMed Central journal article supplement (PMC3928821)
Supplement: Supp_Fig8.pdf [file Supp_Fig8.pdf]

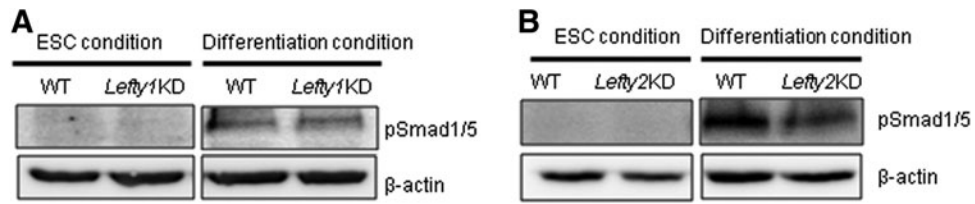

**SUPPLEMENTARY FIG. S8.** Smad1/5 phosphorylation in *Lefty1* KD (**A**) and *Lefty2* KD (**B**) cells was analyzed by immunoblotting under self-renewal or differentiation culture conditions. *Lefty1* KD and *Lefty2* KD were spontaneously differentiated for 3 days by removing LIF and adding RA.
